# Supplementary material for: Comparative structural studies on silver(i) complexes with tripodal polyphosphines. Crystallographic characterisation of the first infinite chain structures in 2 ∶ 1 adducts of silver(i) halides with 1,1,1-tris(diphenylphosphinomethyl)ethane
Source: Royal Society of Chemistry journal article supplement (doi:10.1039/b106021j), 2002-01-01
Supplement: b106021j.doc [file b106021j.doc]

José A. Montes, Susana Rodríguez, Damián Fernández, M. Inés García-Seijo, Robert O. Gould and M. Esther García-Fernández


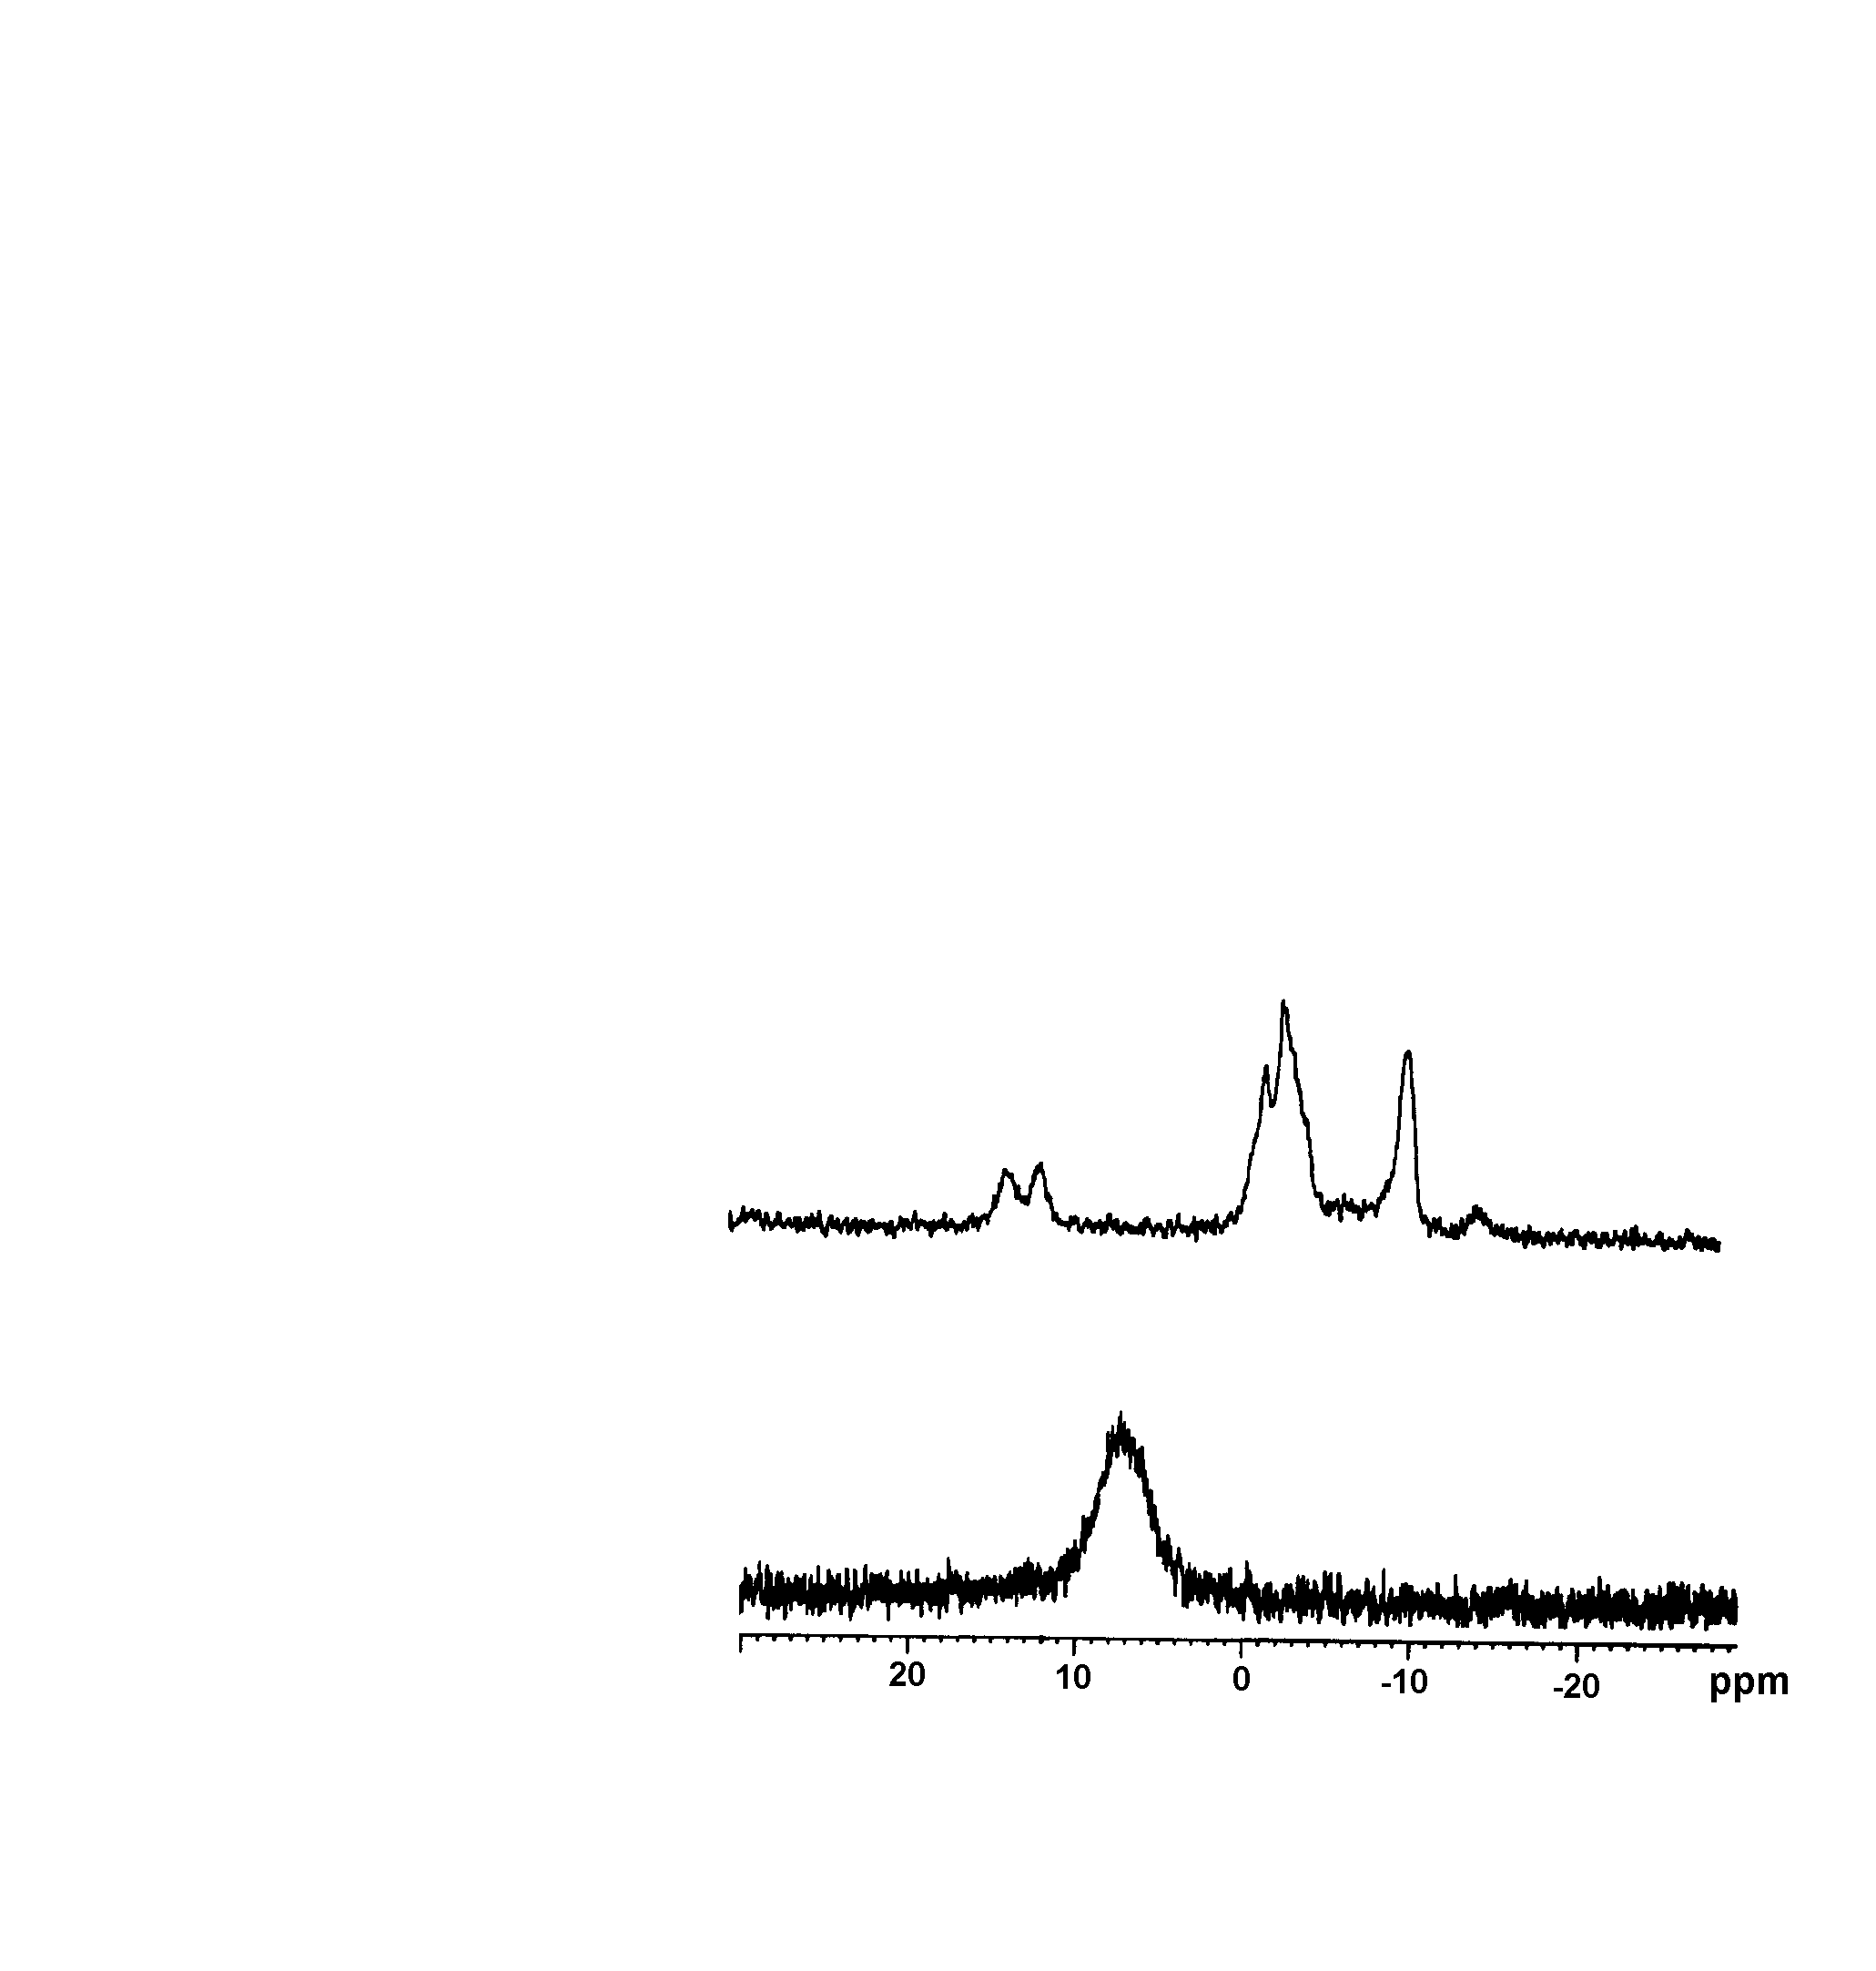


**13**

**13 + 3 equiv PP3**

**Figure S1.-** 31P-{1H NMR spectrum for Ag3(PP3)(NO3)3 (**13**) in CDCl3 + DMF and the addition of 3 mol equivalents of PP3.

**
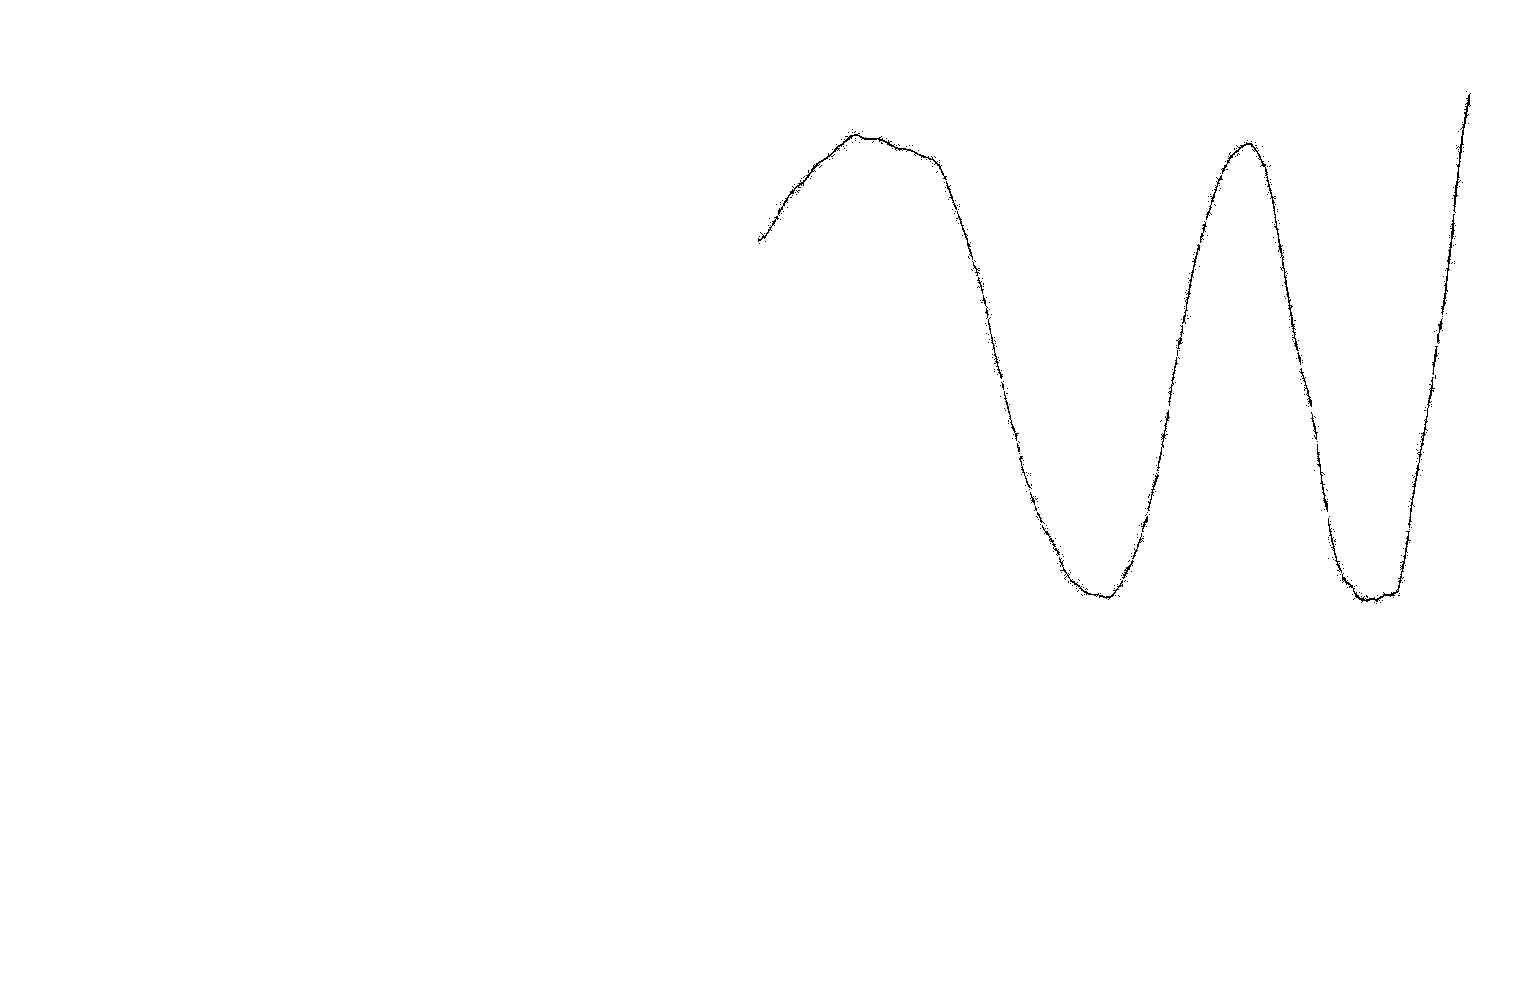
**

**1**

**Ag — Cl**

**Ag-Cl**

**1**

**Transmitance**

204

**8**


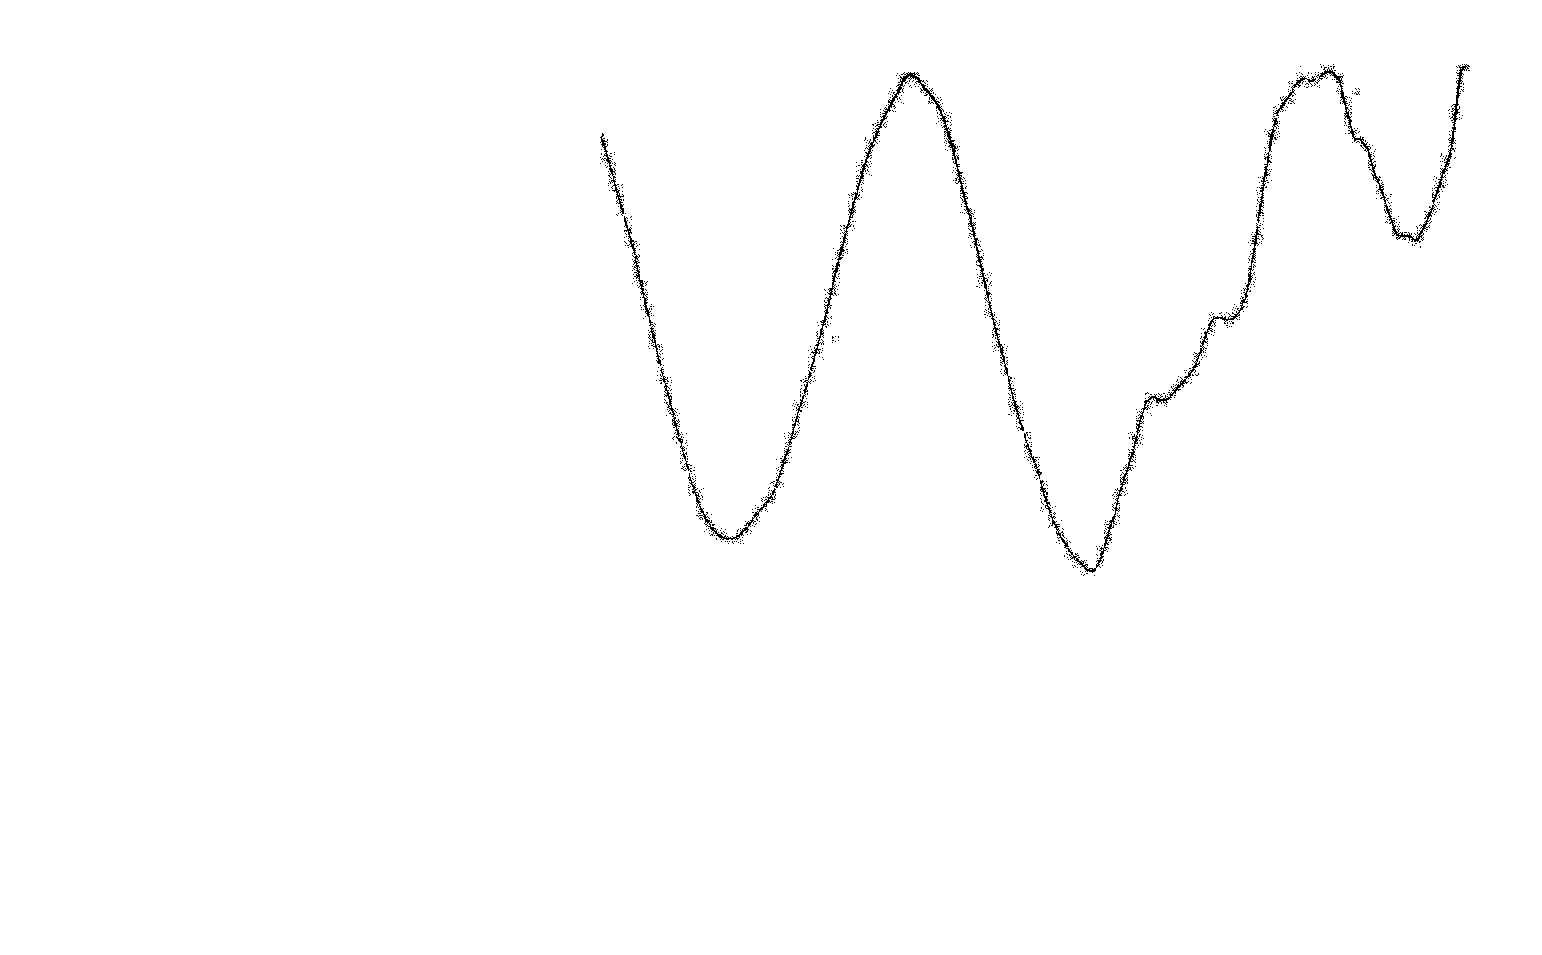


**Transmitance**

171

**8**

190

211

**Wavenumber / cm-1**

211

**Figure S2.**- Far-IR spectra of **1** and **8**. The bands assigned to the (Ag-X) modes are labelled with their wavenumbers.


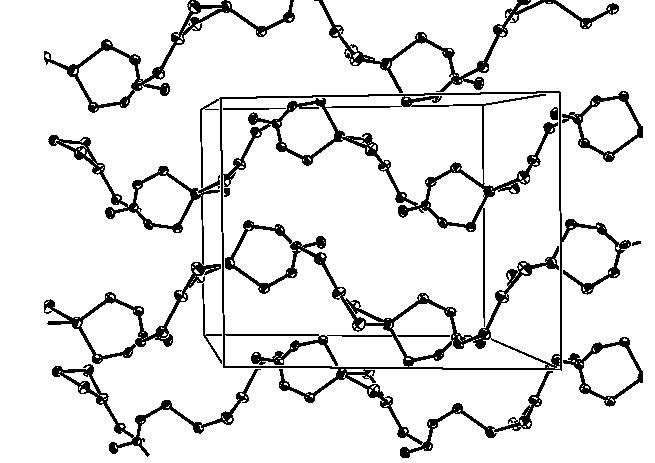


**8**

**Figure S3.**- Propagation of the two zigzag chains along the *c* axis of the unit cell for **8**. Phenyl rings are omitted for clarity.


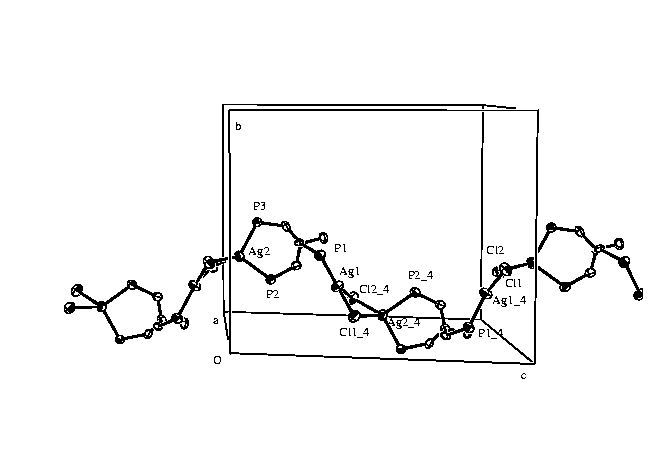


**8**


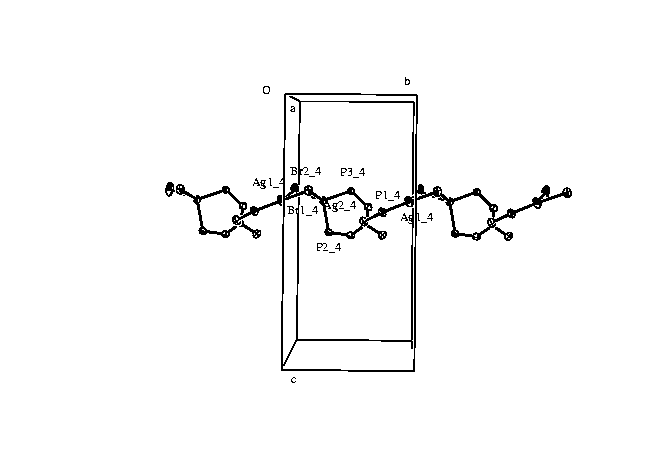


**9**


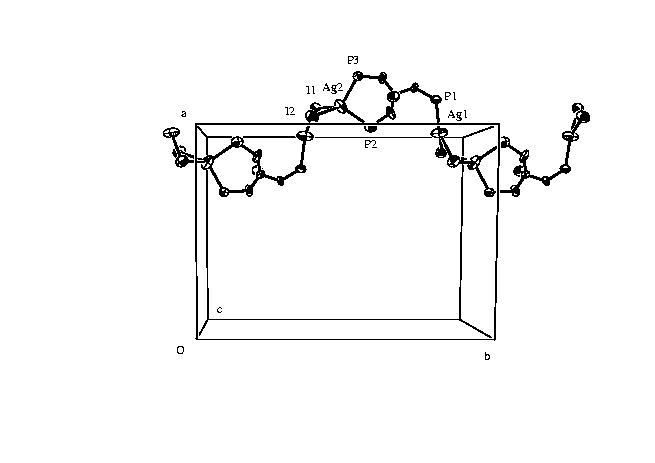
**10**

# Figure S4.- Fragment of an infinite chain for 8, 9 and 10 running through the unit cell. Phenyl rings are omitted for clarity.
